## Localized and Widespread Chronic Pain in Sexual and Gender Minority People – An Analysis of The PRIDE Study

Andrea L. Chadwick, MD, MSc, FASA<sup>1</sup>, Nadra E. Lisha, PhD<sup>2</sup>, Micah E. Lubensky, PhD<sup>3,4</sup>, Zubin Dastur, MS, MPH<sup>4,5</sup>, Mitchell R. Lunn, MD, MAS, FACP, FASN<sup>4,6,7</sup>, Juno Obedin-Maliver, MD, MPH, MAS, FACOG<sup>4,5,7</sup> and Annesa Flentje, PhD<sup>3,4,8</sup>

<sup>1</sup>Department of Anesthesiology, Pain, and Perioperative Medicine, University of Kansas School of Medicine, Kansas City, Kansas

<sup>2</sup>Division of General Internal Medicine, Department of Medicine, University of California, San Francisco, San Francisco, CA

<sup>3</sup>Department of Community Health Systems, University of California, San Francisco, San Francisco, CA

<sup>4</sup>The PRIDE Study/PRIDENet, Stanford University School of Medicine, Stanford, CA

<sup>5</sup>Department of Obstetrics and Gynecology, Stanford University School of Medicine, Stanford, CA

<sup>6</sup>Division of Nephrology, Department of Medicine, Stanford University School of Medicine, Stanford, CA

<sup>7</sup>Department of Epidemiology and Population Health, Stanford University School of Medicine, Stanford, CA

<sup>8</sup>Alliance Health Project, Department of Psychiatry and Behavioral Sciences, University of California San Francisco, San Francisco, CA

Corresponding Author: Andrea L. Chadwick, MD, MSc, FASA – [anicol@kumc.edu](mailto:anicol@kumc.edu)

**Acknowledgements:** The PRIDE Study is a community-engaged research project that serves and is made possible by LGBTQIA+ community involvement at multiple points in the research process, including the dissemination of findings. We acknowledge the courage and dedication of The PRIDE Study participants for sharing their stories; the careful attention of PRIDENet Participant Advisory Committee (PAC) members for reviewing and improving every study application; and the enthusiastic engagement of PRIDENet Ambassadors and Community Partners for bringing thoughtful perspectives as well as promoting enrollment and disseminating findings. For more information, please visit <https://pridenet.org>.

**Conflicts of Interest:** MRL has received consulting fees from Hims, Inc.; Folx Health, Inc.; and Otsuka Pharmaceutical Development and Commercialization, Inc. for work unrelated to this work. JOM has received consulting fees from Hims, Inc.; Folx Health, Inc.; and Sage Therapeutics for work unrelated to the study described here. ALC has received consulting fees from Swing Therapeutics and Scilex Pharmaceuticals for work unrelated to the study described here.

**Funding:** Dr. Chadwick's work on this study was supported in part by the National Institute of General Medical Science (K23GM123320) and the National Institute of Neurological Disorders and Stroke (RM1NS128956). Dr. Flentje's work on this study was supported in part by the National Institute on Drug Abuse (K24DA057874). This study was also partially supported by the National Institute of Diabetes and Digestive and Kidney Diseases (K12DK111028) to JOM. Research reported here was partially supported by funding from the Patient-Centered Outcomes Research Institute (PPRN-1501-26848) to MRL. The statements in this article are solely the responsibility of the authors and do not necessarily represent the views of Patient-Centered Outcomes Research Institute or the National Institutes of Health.

**Abstract:** Sex-related differences (without taking gender into account) in chronic pain have been widely researched over the past few decades in predominantly cisgender (persons whose gender corresponds to their sex assigned at birth) and heterosexual populations. Historically, chronic pain conditions have a higher incidence and prevalence in cisgender women, including but not limited to fibromyalgia, irritable bowel syndrome, and migraine. The goal of the present study was to identify and characterize the presence and characteristics of chronic pain in SM and GM persons using data from

The PRIDE Study, which is the first large-scale, long-term national cohort health study of people who identify as lesbian, gay, bisexual, transgender, queer (LGBTQ+), or as another sexual or gender minority person. A total of 6189 adult participants completed The PRIDE Study's 2022 Annual Questionnaire at the time of data analysis. A total of 2462 (45.6%) participants reported no chronic pain, leaving 2935 (54.6%) participants who reported experiencing chronic pain. The findings from this study highlight that chronic pain is present to a significant degree in sexual and gender minority (SGM) adults who participated in The PRIDE Study with chronic spine pain (cervical, thoracic, and lumbar) being the most common location/region of pain. Notably, more than one-third of non-binary persons, transgender men, and people who selected another gender experienced chronic widespread pain, defined by having 3 or more total regions of chronic pain. The lowest prevalence of chronic widespread pain was among transgender women and cisgender men. When considering sexual orientation, the highest prevalence of widespread pain was in participants who selected another sexual orientation, followed by queer and asexual/demisexual/gray-ace, with the lowest prevalence of chronic widespread pain being in those who identify as straight/heterosexual, bisexual/pansexual, and gay/lesbian. Future studies are planned to elucidate how a variety of biopsychosocial mechanisms may influence chronic pain in SGM persons.

### ***Introduction***

Chronic pain is one of the most prevalent diseases worldwide and leads to substantial disability and enormous socioeconomic costs.<sup>1</sup> Sex-related differences (without taking gender into account) in chronic pain have been widely researched over

the past few decades in predominantly cisgender (persons whose gender corresponds to their sex assigned at birth) and heterosexual populations. The relationship between sex assigned at birth and pain perception is not simple, but generally female sex is associated with increased pain sensitivity and reduced endogenous analgesia.<sup>2</sup> Historically, chronic pain conditions have a higher incidence and prevalence in cisgender women, including but not limited to fibromyalgia, irritable bowel syndrome, and migraine.<sup>3</sup> However, as research with gender and sexual minorities has increased, data suggest that higher rates of chronic pain syndromes are observed in sexual minority (SM, persons who are gay, lesbian, bisexual, or have other non-heterosexual sexual orientations) and gender minority (GM, persons with a gender identity or expression that is different than that traditionally expected based on the sex they were assigned at birth) populations compared to heterosexual and cisgender populations.<sup>4-6</sup>

The goal of the present study was to identify and characterize the presence and characteristics of chronic pain in SM and GM persons using data from The PRIDE Study, which is the first large-scale, long-term national cohort health study of people who identify as lesbian, gay, bisexual, transgender, queer (LGBTQ+), or as another sexual or gender minority person.

## **Methods**

Participants in The Population Research in Identity and Disparities for Equality (PRIDE) Study complete an Annual Questionnaire, which asks questions regarding their physical, mental, and social health.<sup>7</sup> Consent was obtained electronically and institutional review board approval was obtained from the University of California, San Francisco, Stanford University, and WIRB-Copernicus Group (WCG) IRB. For our study,

our primary outcomes of interest included chronic pain measures. Participants were instructed to identify on the Michigan Body Map<sup>8</sup> the regions of their body that they have chronic pain or to identify that they do not have chronic pain. We calculated the proportion of participants who reported chronic pain in a total of seven body regions including: A) Left shoulder, left upper arm, left lower arm; B) right shoulder, right upper arm, right lower arm; C) left hip/left buttocks, left upper leg, left lower leg; D) right hip/right buttocks, right upper leg, right lower leg; E) neck, upper back, lower back; F) chest, abdomen; and G) right jaw and left jaw.<sup>9</sup> Furthermore, we identified the proportion of participants who had chronic pain in greater than or equal to 3 regions of the body, which we defined as being positive for the presence of widespread pain.<sup>9</sup>

We stratified by participant-selected gender identity group: cisgender men, cisgender women, non-binary, transgender men, transgender women, and another gender identity. We also stratified by participant-selected sexual orientation group: asexual/demisexual/gray-ace, bisexual/pansexual, gay/lesbian, heterosexual/straight, queer, and another sexual orientation.

Descriptive statistics for the presence of chronic pain based on body region, presence of widespread pain, presence of chronic pain by body region stratified by gender group and sexual orientation, and presence of widespread chronic pain stratified by gender group and sexual orientation were calculated using SAS (Cary, NC).

## **Results**

A total of 6189 adult participants completed The PRIDE Study's 2022 Annual Questionnaire at the time of data analysis. Among those, 792 participants did not complete pain survey items, leaving 5397 participants who completed pain survey

items. A total of 2462 (45.6%) participants reported no chronic pain, leaving 2935 (54.6%) participants who reported experiencing chronic pain. The presence of reported chronic pain in the 7 different pain body regions is described in Table 1 (by gender identity group) and Table 2 (by sexual orientation group).

**Table 1. Prevalence of Painful Body Regions in The PRIDE Study Participants, Stratified by Gender Identity Group.**

| Body Region                              | Cisgender Men (N (%)) | Cisgender Women (N (%)) | Non-Binary (N (%)) | Transgender Men (N (%)) | Transgender Women (N (%)) | Another Gender (N (%)) |
|------------------------------------------|-----------------------|-------------------------|--------------------|-------------------------|---------------------------|------------------------|
| Left shoulder, upper arm, lower arm      | 171 (14)              | 290 (19)                | 336 (28.3)         | 138 (24.4)              | 55 (21)                   | 58 (31.4)              |
| Right shoulder, upper arm, lower arm     | 182 (14.9)            | 338 (22.2)              | 352 (29.6)         | 166 (29.1)              | 46 (17.6)                 | 63 (34.1)              |
| Left hip/buttocks, upper leg, lower leg  | 188 (15.4)            | 329 (21.5)              | 329 (27.7)         | 150 (26.5)              | 52 (19.8)                 | 65 (35.1)              |
| Right hip/buttocks, upper leg, lower leg | 202 (16.5)            | 365 (23.9)              | 343 (28.9)         | 152 (26.9)              | 53 (20.2)                 | 59 (31.7)              |
| Neck, upper back, lower back             | 453 (33.7)            | 726 (44)                | 659 (52.4)         | 322 (51.8)              | 114 (38.1)                | 107 (53.8)             |
| Chest, abdomen                           | 85 (6.9)              | 183 (11.8)              | 237 (19.8)         | 90 (15.7)               | 33 (12.4)                 | 31 (16.7)              |
| Right jaw, left jaw                      | 60 (4.9)              | 183 (11.9)              | 200 (16.7)         | 76 (13.3)               | 27 (10)                   | 31 (16.8)              |
| Widespread pain                          | 211 (15.65)           | 413 (24.9)              | 453 (35.9)         | 195 (31.3)              | 64 (21.3)                 | 75 (37.7)              |

**Table 2. Prevalence of Painful Body Regions in The PRIDE Study Participants, Stratified by Sexual Orientation.**

| Body Region                              | Asexual/Demisexual/Gray-Ace (N (%)) | Bisexual/Pansexual (N (%)) | Gay/Lesbian (N (%)) | Heterosexual/Straight (N (%)) | Queer (N (%)) | Another Sexual Orientation (N (%)) |
|------------------------------------------|-------------------------------------|----------------------------|---------------------|-------------------------------|---------------|------------------------------------|
| Left shoulder, upper arm, lower arm      | 99 (25.7)                           | 251 (20)                   | 372 (18.1)          | 18 (27.7)                     | 304 (25.9)    | 5 (29.4)                           |
| Right shoulder, upper arm, lower arm     | 98 (25.3)                           | 283 (22.6)                 | 404 (19.6)          | 18 (27.7)                     | 341 (29.2)    | 5 (29.4)                           |
| Left hip/buttocks, upper leg, lower leg  | 114 (29.4)                          | 265 (21.1)                 | 404 (19.6)          | 16 (24.2)                     | 312 (26.6)    | 4 (23.5)                           |
| Right hip/buttocks, upper leg, lower leg | 112 (28.9)                          | 274 (21.9)                 | 431 (20.8)          | 13 (20)                       | 341 (29.1)    | 4 (23.5)                           |
| Neck, upper back, lower back             | 198 (48.1)                          | 604 (44.1)                 | 867 (38.6)          | 33 (47.8)                     | 671 (53.3)    | 11(55)                             |
| Chest, abdomen                           | 70 (18)                             | 176 (13.9)                 | 200 (9.6)           | 11 (16.7)                     | 198 (16.7)    | 4 (23.5)                           |
| Right jaw, left jaw                      | 60 (15.4)                           | 156 (12.4)                 | 167 (8.1)           | 7 (10.6)                      | 185 (15.7)    | 2 (11.8)                           |
| Widespread pain                          | 135 (32.7)                          | 354 (25.8)                 | 478 (21.2)          | 20 (28.6)                     | 419 (33.2)    | 7 (35)                             |

## Discussion

The findings from this study highlight that chronic pain is present to a significant degree in sexual and gender minority (SGM) adults who participated in The PRIDE Study with chronic spine pain (cervical, thoracic, and lumbar) being the most common location/region of pain. Notably, more than one-third of non-binary persons, transgender

men, and people who selected another gender experienced chronic widespread pain, defined by having 3 or more total regions of chronic pain. The lowest prevalence of chronic widespread pain was among transgender women and cisgender men. When considering sexual orientation, the highest prevalence of widespread pain was in participants who selected another sexual orientation, followed by queer and asexual/demisexual/gray-ace, with the lowest prevalence of chronic widespread pain being in those who identify as straight/heterosexual, bisexual/pansexual, and gay/lesbian.

In a recent systematic review and meta-analysis, the overall estimated population prevalence of chronic widespread pain was 9.6%, with women and men having 11.2% and 7.2%, respectively.<sup>10</sup> Our findings highlight the greater prevalence of widespread chronic pain in SGM persons as compared to these recently published figures, which likely are representative of a primarily cisgender heterosexual population. Our findings replicate recently published data in the sexual minority population, which showed prevalence of widespread pain as 16.1% in gay/lesbian people, 20.1% in bisexual people, and 22.9% in persons endorsing another sexual orientation.<sup>6</sup>

Overall, these findings support the need for more comprehensive studies to elucidate mechanisms for increased widespread pain prevalence in SGM populations. Possible explanations for increased prevalence of SGM populations include increased levels of chronic minority stress, history of childhood or adulthood adverse life events, in addition to limited access to appropriate primary and specialty medical care. However, a limitation of the present study includes the inability to assess how these or other additional factors may play a role in the development of chronic pain and widespread

pain in SGM populations. There may also be selection bias in The PRIDE Study as SGM persons who experience pain issues may be more likely to enroll in a national SGM health study. Future studies are planned to elucidate how a variety of biopsychosocial mechanisms may influence chronic pain in SGM persons.

1. GBD 2017 Disease and Injury Incidence and Prevalence Collaborators. Global, regional, and national incidence, prevalence, and years lived with disability for 354 diseases and injuries for 195 countries and territories, 1990-2017: a systematic analysis for the Global Burden of Disease Study 2017. *Lancet*. 2018;392(10159):1789-858. Epub 20181108. doi: 10.1016/S0140-6736(18)32279-7. PubMed PMID: 30496104; PMCID: PMC6227754.
2. Paller CJ, Campbell CM, Edwards RR, Dobs AS. Sex-based differences in pain perception and treatment. *Pain Med*. 2009;10(2):289-99. Epub 20090116. doi: 10.1111/j.1526-4637.2008.00558.x. PubMed PMID: 19207233; PMCID: PMC2745644.
3. Fillingim RB, King CD, Ribeiro-Dasilva MC, Rahim-Williams B, Riley JL, 3rd. Sex, gender, and pain: a review of recent clinical and experimental findings. *J Pain*. 2009;10(5):447-85. doi: 10.1016/j.jpain.2008.12.001. PubMed PMID: 19411059; PMCID: PMC2677686.
4. Levit D, Yaish I, Shtrozberg S, Aloush V, Greenman Y, Ablin JN. Pain and transition: evaluating fibromyalgia in transgender individuals. *Clin Exp Rheumatol*. 2021;39 Suppl 130(3):27-32. Epub 20210113. PubMed PMID: 33506751.
5. Aloisi AM, Bachiocco V, Costantino A, Stefani R, Ceccarelli I, Bertaccini A, Meriggiola MC. Cross-sex hormone administration changes pain in transsexual women and men. *Pain*. 2007;132 Suppl 1:S60-S7. Epub 20070326. doi: 10.1016/j.pain.2007.02.006. PubMed PMID: 17379410.
6. Zajacova A, Grol-Prokopczyk H, Liu H, Reczek R, Nahin RL. Chronic pain among U.S. sexual minority adults who identify as gay, lesbian, bisexual, or "something else". *Pain*. 2023;164(9):1942-53. Epub 20230330. doi: 10.1097/j.pain.0000000000002891. PubMed PMID: 37017364; PMCID: PMC10436360.
7. Lunn MR, Lubensky M, Hunt C, Flentje A, Capriotti MR, Sooksaman C, Harnett T, Currie D, Neal C, Obedin-Maliver J. A digital health research platform for community engagement, recruitment, and retention of sexual and gender minority adults in a national longitudinal cohort study--The PRIDE Study. *J Am Med Inform Assoc*. 2019;26(8-9):737-48. doi: 10.1093/jamia/ocz082. PubMed PMID: 31162545; PMCID: PMC6696499.
8. Brummett CM, Bakshi RR, Goesling J, Leung D, Moser SE, Zollars JW, Williams DA, Clauw DJ, Hassett AL. Preliminary validation of the Michigan Body Map. *Pain*. 2016;157(6):1205-12. doi: 10.1097/j.pain.0000000000000506. PubMed PMID: 26835782; PMCID: PMC4868633.
9. Lai H, Bayman EO, Bishop MO, Landis R, Harte SE, Clemens Q, Rodriguez LV, Sutcliffe S, Taple BJ, Naliboff BD. Longitudinal Changes in the Pelvic Pain Only and Widespread Pain Phenotypes Over One Year in the MAPP-I Urologic Chronic Pelvic Pain Syndrome (UCPPS) Cohort. *Urology*. 2022;161:31-5. Epub 20220110. doi: 10.1016/j.urology.2021.12.016. PubMed PMID: 35021046; PMCID: PMC9502024.



10. Andrews P, Steultjens M, Riskowski J. Chronic widespread pain prevalence in the general population: A systematic review. *Eur J Pain*. 2018;22(1):5-18. Epub 20170817. doi: 10.1002/ejp.1090. PubMed PMID: 28815801.
